# Supplementary material for: Understanding and solving disorder in the substitution pattern of amino functionalized MIL-47(V)
Source: Royal Society of Chemistry journal article supplement (doi:10.1039/c5dt03399c), 2015-11-30
Supplement: c5dt03399c1.pdf [file c5dt03399c1.pdf]

# Supporting Information for: Understanding and Solving Disorder in Substitution Pattern of Amino Functionalized MIL-47(V)

Jurn Heinen, David Dubbeldam  
Van 't Hoff Institute for Molecular Sciences, University of Amsterdam  
Science Park 908, 1098 XH Amsterdam, The Netherlands

November 17, 2015

## List of Figures

|    |                                                                                                                                                                                                                                                                                                                           |   |
|----|---------------------------------------------------------------------------------------------------------------------------------------------------------------------------------------------------------------------------------------------------------------------------------------------------------------------------|---|
| S1 | Channels of four amino functionalized MIL-47(V) viewed along the a-axis. . . . .                                                                                                                                                                                                                                          | 2 |
| S2 | CB-GCMC adsorption isotherm of benzene for MIL-47(V) and NH <sub>2</sub> -MIL-47(V) at T = 328 K. . . . .                                                                                                                                                                                                                 | 3 |
| S3 | A2B5 NH <sub>2</sub> -MIL-47(V) supercell with adjacent BDC-linkers highlighted to illustrate repulsive behaviour of the nitrogens when constrained along the b-axis. . . . .                                                                                                                                             | 4 |
| S4 | Heat of adsorption $\Delta H$ in [kJ/mol] at 303 K as function of excess loading in [mol/kg] for NH <sub>2</sub> -MIL-47(V) and MIL-47(V) computed from fluctuation formula. . . . .                                                                                                                                      | 5 |
| S5 | Heat of adsorption $\Delta H$ and average guest-guest (gg) and host-guest (hg) energy per adsorbate expressed in electrostatics (Coul) and Van der Waals (VDW) contributions as function of the excess loading for (a) MIL-47(V) and (b) A2B2 NH <sub>2</sub> -MIL-47(V) for CO <sub>2</sub> adsorption at 303 K. . . . . | 6 |

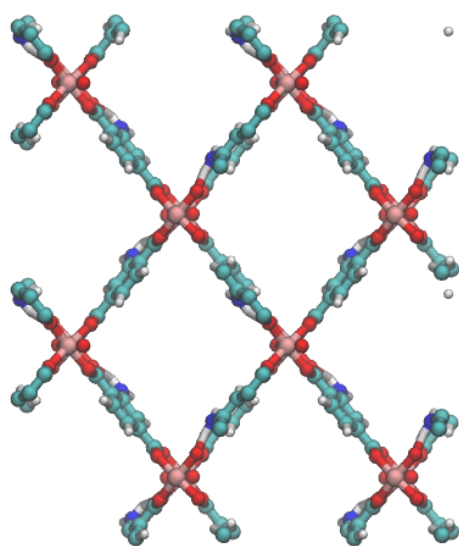

A2B2

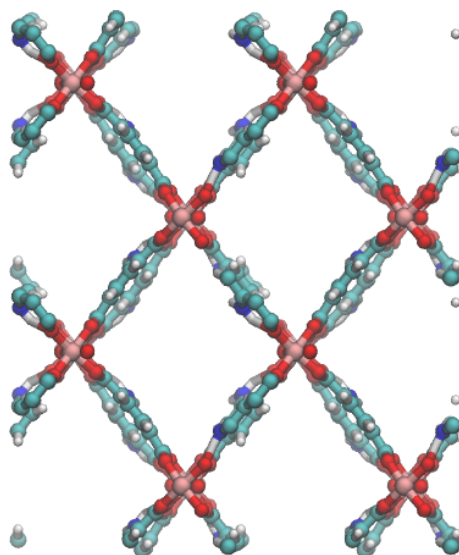

A2B3

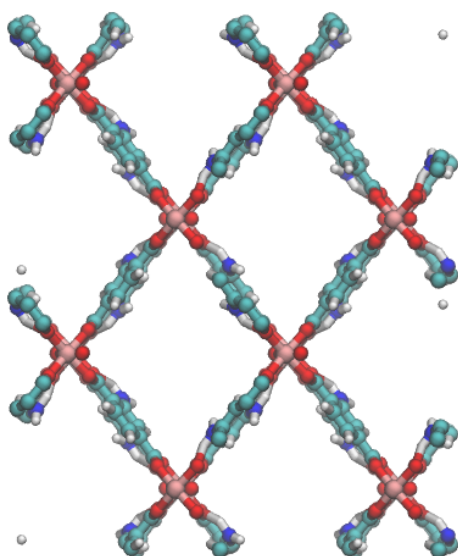

A2B5

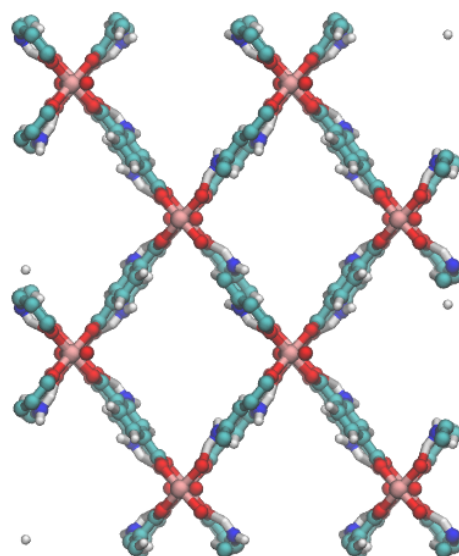

A2B6

**Figure S1:** Channels of four amino functionalized MIL-47(V) viewed along the a-axis.

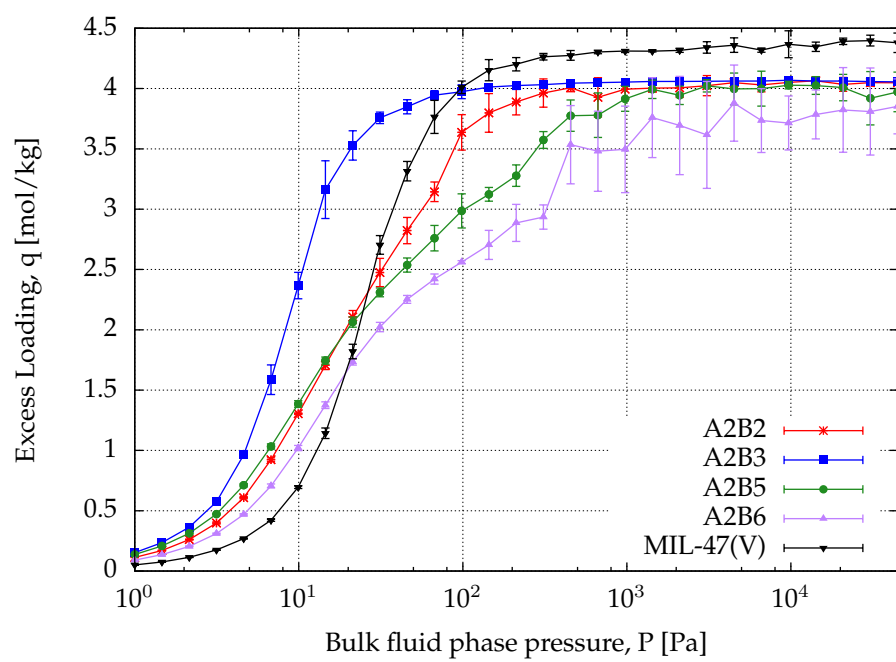

**Figure S2:** CB-GCMC adsorption isotherm of benzene for MIL-47(V) and NH<sub>2</sub>-MIL-47(V) at T = 328 K.

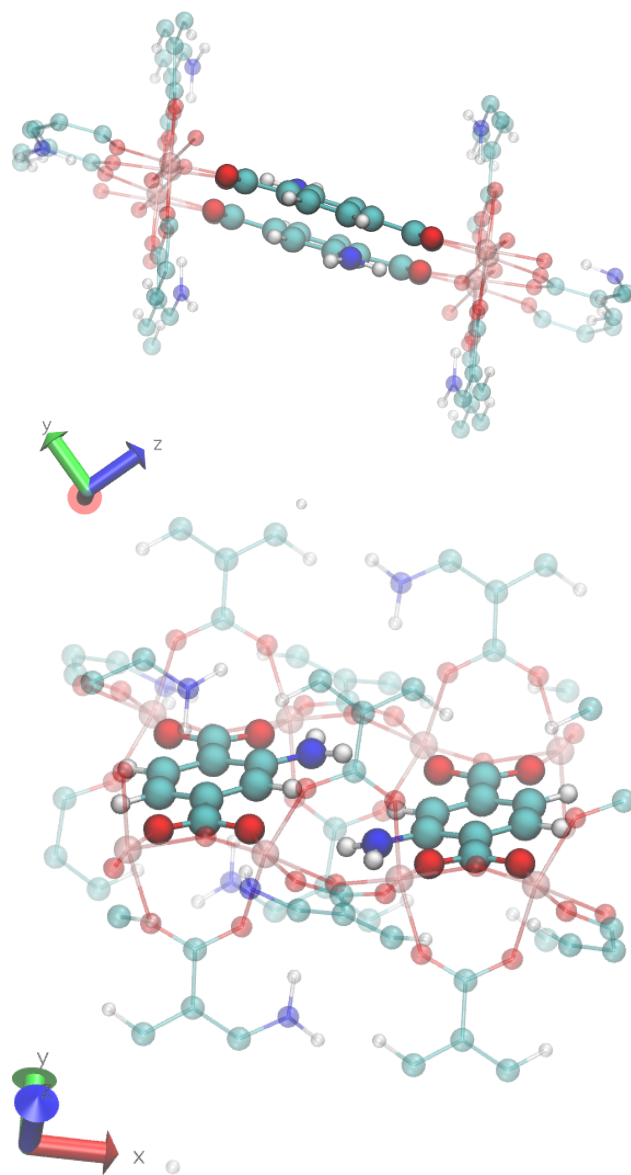

**Figure S3:** A2B5 NH<sub>2</sub>-MIL-47(V) supercell with adjacent BDC-linkers highlighted to illustrate repulsive behaviour of the nitrogens when constrained along the b-axis.

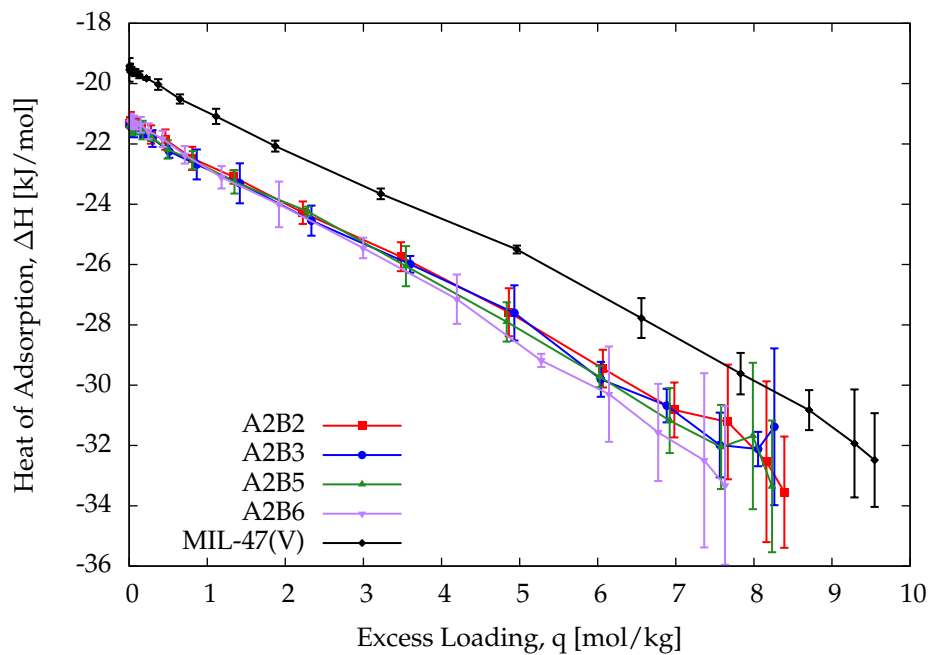

(a)  $\text{CO}_2$

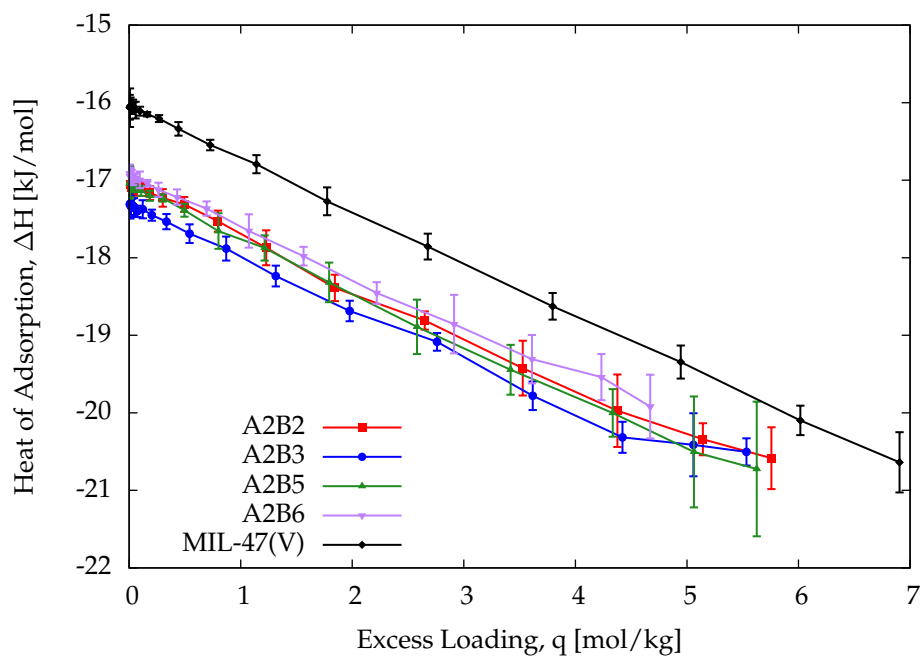

(b) methane

**Figure S4:** Heat of adsorption  $\Delta H$  in [kJ/mol] at 303 K as function of excess loading in [mol/kg] for  $\text{NH}_2$ -MIL-47(V) and MIL-47(V) computed from fluctuation formula.

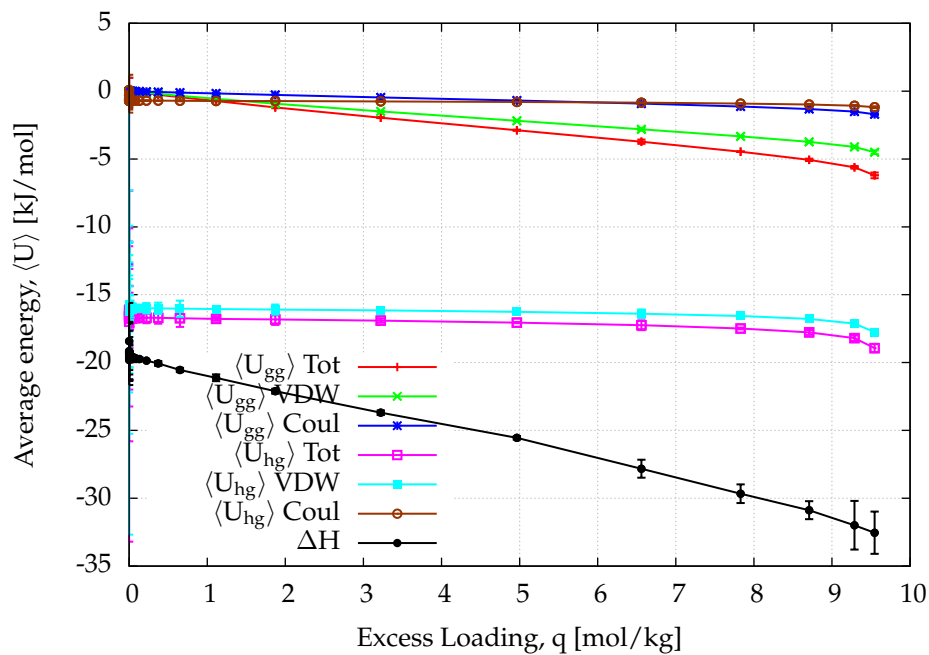

(a) MIL-47(V)

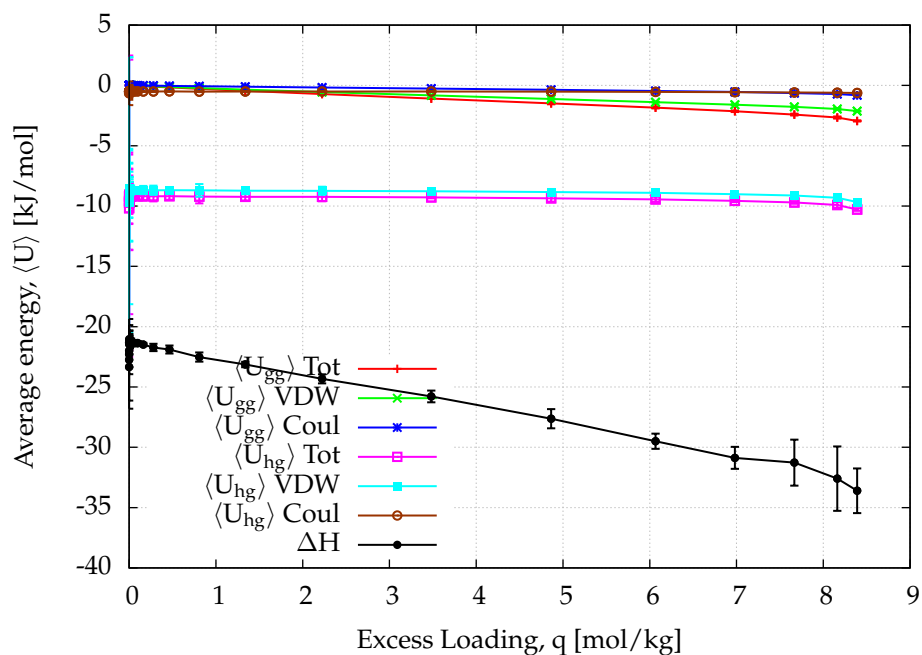

(b) A2B2 NH<sub>2</sub>-MIL-47(V)

**Figure S5:** Heat of adsorption  $\Delta H$  and average guest-guest (gg) and host-guest (hg) energy in [kJ/mol] per adsorbate expressed in electrostatics (Coul) and Van der Waals (VDW) contributions as function of the excess loading for (a) MIL-47(V) and (b) A2B2 NH<sub>2</sub>-MIL-47(V) for CO<sub>2</sub> adsorption at 303 K.
